# Supplementary material for: A Novel Metagenomic Short-Chain Dehydrogenase/Reductase Attenuates Pseudomonas aeruginosa Biofilm Formation and Virulence on Caenorhabditis elegans
Source: PubMed Central journal article supplement (PMC3202535; doi:10.1371/journal.pone.0026278), 2011-10-26
Supplement: pone.0026278.s001.pdf [file pone.0026278.s001.pdf]

# Figure S1

## A

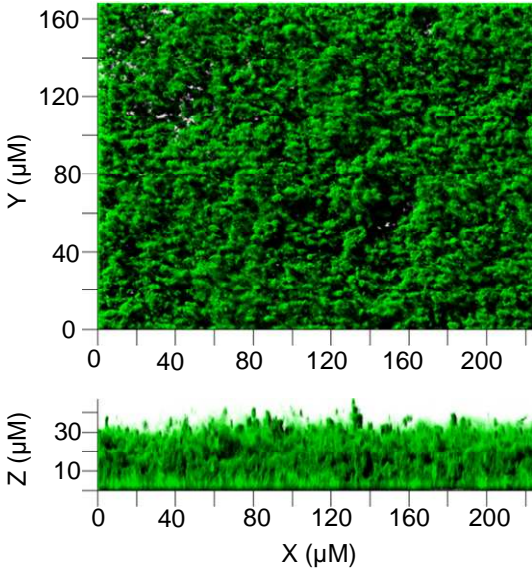

pBBR1MCS-5 (empty vector)

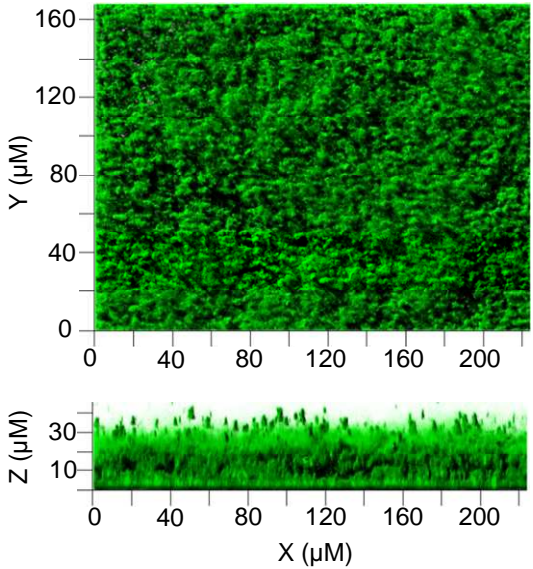

pBBR1MCS-5::ce/A

## B

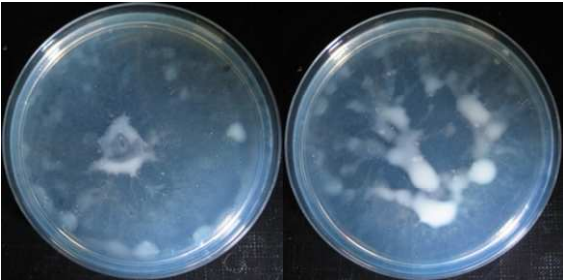

pBBR1MCS-5 (empty vector)

pBBR1MCS-5::ce/A
