# Supplementary material for: A Novel Metagenomic Short-Chain Dehydrogenase/Reductase Attenuates Pseudomonas aeruginosa Biofilm Formation and Virulence on Caenorhabditis elegans
Source: PubMed Central journal article supplement (PMC3202535; doi:10.1371/journal.pone.0026278), 2011-10-26

Figure S2

A

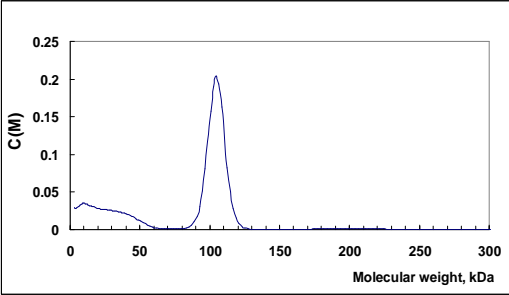

B

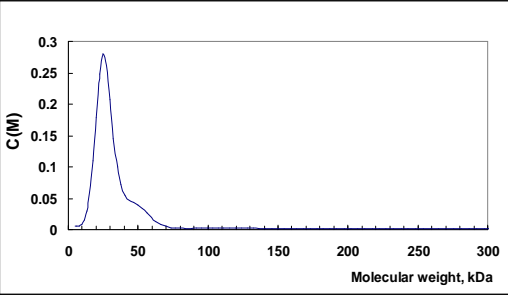

C

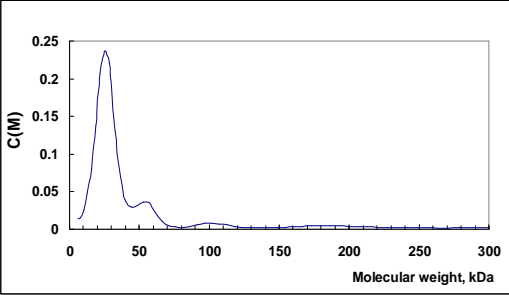

Supplement: pone.0026278.s002.pdf [file pone.0026278.s002.pdf]
