# Supplementary material for: A Novel Metagenomic Short-Chain Dehydrogenase/Reductase Attenuates Pseudomonas aeruginosa Biofilm Formation and Virulence on Caenorhabditis elegans
Source: PubMed Central journal article supplement (PMC3202535; doi:10.1371/journal.pone.0026278), 2011-10-26
Supplement: pone.0026278.s005.pdf [file pone.0026278.s005.pdf]

**TABLE S1.** Bacterial strains and plasmids used in this study.

| Strain/ Plasmid                             | Properties                                                                                                | Reference                                          |
|---------------------------------------------|-----------------------------------------------------------------------------------------------------------|----------------------------------------------------|
| <b>Strains</b>                              |                                                                                                           |                                                    |
| <i>E. coli</i> DH5 $\alpha$                 | Cloning strain, <i>recA1</i> , $\Delta$ <i>lacZ</i>                                                       | Gibco BRL now Invitrogen                           |
| <i>E. coli</i> BL21 (DE3)                   | Expression strain                                                                                         | [1]                                                |
| <i>P. aeruginosa</i> PAO1                   | Parent strain                                                                                             | [2]                                                |
| <i>C. violaceum</i> (DSM Nr. 30191)         | Parent strain                                                                                             | DSMZ, Braunschweig                                 |
| <i>A. tumefaciens</i> NTL4 (pCF218)(pCF372) | Reporter strain for autoinducer molecules, <i>tral::lacZ</i> , km <sup>R</sup> , carrying pCF218 & pCF372 | [3-5]                                              |
| <i>A. tumefaciens</i> KYC6                  | AHL overproducing transposon mutant                                                                       | [3]                                                |
| <b>Plasmids</b>                             |                                                                                                           |                                                    |
| pBio5-pBKCMV                                | Metagenome-derived clone encoding <i>bpiB09</i> gene in pBK-CMV, km <sup>R</sup>                          | This work, GenBank# EF530730.1,                    |
| pBluescript SK+                             | Cloning vector, amp <sup>R</sup>                                                                          | Fermentas/Thermo Scientific, St. Leon-Rot, Germany |
| pET-19a                                     | N-terminal 10-his cloning vector, amp <sup>R</sup>                                                        | Novagen, Karlsruhe, Germany                        |
| pET-21a                                     | C-terminal 6-his cloning vector, amp <sup>R</sup>                                                         |                                                    |
| pBBR1MCS-5                                  | Broad host-range vector, km <sup>R</sup>                                                                  | [6]                                                |
| pBK-CMV                                     | Phagemid vector; km <sup>R</sup>                                                                          | Stratagene                                         |
| pET19b:: <i>bpiB09_dimer</i>                | Dimerization mutants G162Y and D109K                                                                      | This work                                          |
| pET19b:: <i>bpiB09_tetra</i>                | Tetramerization mutant, G162Y and D109K and deletion of F227 to end                                       | This work                                          |
| pBBR1MCS-5:: <i>bpiB09</i>                  | pBBR1MCS-5 containing <i>bpiB09</i>                                                                       | This work                                          |
| pBBR1MCS-5:: <i>celA</i>                    | pBBR1MCS-5 containing 2 kb cellulase gene, experimental control                                           | [7]                                                |
| pBBR1MCS-5:: <i>ACP_0942</i>                | pBBR1MCS-5 containing <i>A. capsulatum</i> possible SDR gene ACP_0942                                     | This work                                          |

1. Studier FW, Moffatt BA (1986) Use of bacteriophage T7 RNA polymerase to direct selective high-level expression of cloned genes. *J Mol Biol* 189: 113-130.
2. Holloway BW, Krishnapillai V, Morgan AF (1979) Chromosomal genetics of *Pseudomonas*. *Microbiol Rev* 43: 73-102.
3. Fuqua WC, Winans SC (1994) A LuxR-LuxI type regulatory system activates *Agrobacterium* Ti plasmid conjugal transfer in the presence of a plant tumor metabolite. *J Bacteriol* 176: 2796-2806.
4. Fuqua C, Winans SC (1996) Conserved cis-acting promoter elements are required for density-dependent transcription of *Agrobacterium tumefaciens* conjugal transfer genes. *J Bacteriol* 178: 435-440.
5. Luo ZQ, Clemente TE, Farrand SK (2001) Construction of a derivative of *Agrobacterium tumefaciens* C58 that does not mutate to tetracycline resistance. *Mol Plant Microbe Interact* 14: 98-103.
6. Kovach ME, Elzer PH, Hill DS, Robertson GT, Farris MA, et al. (1995) Four new derivatives of the broad-host-range cloning vector pBBR1MCS, carrying different antibiotic-resistance cassettes. *Gene* 166: 175-176.
7. Schipper C, Hornung C, Bijtenhoorn P, Quitschau M, Grond S, et al. (2009) Metagenome-derived clones encoding two novel lactonase family proteins involved in biofilm inhibition in *Pseudomonas aeruginosa*. *Appl Environ Microbiol* 75: 224-233.
