# Supplementary material for: A Novel Metagenomic Short-Chain Dehydrogenase/Reductase Attenuates Pseudomonas aeruginosa Biofilm Formation and Virulence on Caenorhabditis elegans
Source: PubMed Central journal article supplement (PMC3202535; doi:10.1371/journal.pone.0026278), 2011-10-26
Supplement: pone.0026278.s006.pdf [file pone.0026278.s006.pdf]

**Table S2.** ≥10-fold repressed genes/ORFs in PAO1 expressing *bpiB09*<sup>a</sup>

| ORF <sup>b</sup> | Gene          | Description                                   |
|------------------|---------------|-----------------------------------------------|
| PA0005           | <i>lptA</i>   | lysophosphatidic acid acyltransferase, LptA   |
| PA0006           |               | D,D-heptose 1,7-bisphosphate phosphatase      |
| PA0007           |               | hypothetical protein                          |
| PA0012           |               | hypothetical protein                          |
| PA0031           | <i>betC</i>   | choline sulfatase                             |
| PA0033           |               | hypothetical protein                          |
| PA0037           | <i>trpI</i>   | transcriptional regulator TrpI                |
| PA0043           |               | hypothetical protein                          |
| PA0049           |               | hypothetical protein                          |
| PA0053           |               | hypothetical protein                          |
| PA0056           |               | transcriptional regulator                     |
| PA0057           |               | hypothetical protein                          |
| PA0058           |               | hypothetical protein                          |
| PA0060           |               | hypothetical protein                          |
| PA0103           |               | sulfate transporter                           |
| PA0104           |               | hypothetical protein                          |
| PA0108           | <i>colIII</i> | cytochrome c oxidase, subunit III             |
| PA0109           |               | hypothetical protein                          |
| PA0110           |               | hypothetical protein                          |
| PA0114           | <i>senC</i>   | SenC                                          |
| PA0117           |               | short chain dehydrogenase                     |
| PA0122           |               | hypothetical protein                          |
| PA0135           |               | hypothetical protein                          |
| PA0136           |               | ATP-binding component of ABC transporter      |
| PA0137           |               | permease of ABC transporter                   |
| PA0146           |               | hypothetical protein                          |
| PA0149           |               | sigma-70 factor, ECF subfamily                |
| PA0150           |               | transmembrane sensor                          |
| PA0151           |               | TonB-dependent receptor                       |
| PA0153           | <i>pcaH</i>   | protocatechuate 3,4-dioxygenase, beta subunit |
| PA0155           | <i>pcaR</i>   | transcriptional regulator PcaR                |
| PA0166           |               | transporter                                   |
| PA0173           |               | chemotaxis-specific methylesterase            |
| PA0178           |               | two-component sensor                          |
| PA0179           |               | two-component response regulator              |
| PA0189           |               | porin                                         |
| PA0190           |               | acid phosphatase                              |
| PA0191           |               | transcriptional regulator                     |
| PA0192           |               | TonB-dependent receptor                       |
| PA0194           |               | hypothetical protein                          |
| PA0197           | <i>tonB2</i>  | TonB2                                         |
| PA0209           |               | triphosphoribosyl-dephospho-CoA synthase      |
| PA0212           | <i>mdcE</i>   | malonate decarboxylase gamma subunit          |
| PA0214           |               | acyl transferase                              |

| ORF    | Gene        | Description                                                |
|--------|-------------|------------------------------------------------------------|
| PA0220 |             | amino acid APC family transporter                          |
| PA0234 |             | hypothetical protein                                       |
| PA0236 |             | transcriptional regulator                                  |
| PA0244 |             | shikimate 5-dehydrogenase                                  |
| PA0247 | <i>pobA</i> | 4-hydroxybenzoate 3-monooxygenase                          |
| PA0252 |             | hypothetical protein                                       |
| PA0256 |             | hypothetical protein                                       |
| PA0273 |             | major facilitator superfamily (MFS) transporter            |
| PA0274 |             | hypothetical protein                                       |
| PA0285 |             | hypothetical protein                                       |
| PA0288 | <i>gpuA</i> | 3-guanidinopropionase                                      |
| PA0295 |             | periplasmic polyamine binding protein                      |
| PA0307 |             | hypothetical protein                                       |
| PA0320 |             | hypothetical protein                                       |
| PA0323 |             | binding protein component of ABC transporter               |
| PA0324 |             | permease of ABC transporter                                |
| PA0326 |             | ATP-binding component of ABC transporter                   |
| PA0339 |             | hypothetical protein                                       |
| PA0345 |             | hypothetical protein                                       |
| PA0346 |             | hypothetical protein                                       |
| PA0355 | <i>pfpl</i> | protease Pfpl                                              |
| PA0359 |             | hypothetical protein                                       |
| PA0364 |             | oxidoreductase                                             |
| PA0369 |             | hypothetical protein                                       |
| PA0371 |             | hypothetical protein                                       |
| PA0378 |             | monofunctional biosynthetic peptidoglycan transglycosylase |
| PA0386 |             | coproporphyrinogen III oxidase                             |
| PA0404 |             | Holliday junction resolvase-like protein                   |
| PA0417 | <i>chpE</i> | chemotaxis protein                                         |
| PA0435 |             | hypothetical protein                                       |
| PA0439 |             | dihydropyrimidine dehydrogenase                            |
| PA0440 |             | oxidoreductase                                             |
| PA0442 |             | hypothetical protein                                       |
| PA0452 |             | stomatin-like protein                                      |
| PA0455 | <i>dbpA</i> | ATP-dependent RNA helicase DbpA                            |
| PA0466 |             | hypothetical protein                                       |
| PA0471 |             | transmembrane sensor                                       |
| PA0475 |             | transcriptional regulator                                  |
| PA0477 |             | transcriptional regulator                                  |
| PA0485 |             | hypothetical protein                                       |
| PA0486 |             | serine/threonine protein kinase                            |
| PA0490 |             | hypothetical protein                                       |
| PA0491 |             | transcriptional regulator                                  |
| PA0492 |             | hypothetical protein                                       |
| PA0498 |             | hypothetical protein                                       |
| PA0539 |             | hypothetical protein                                       |

| ORF    | Gene         | Description                                                                                           |
|--------|--------------|-------------------------------------------------------------------------------------------------------|
| PA0544 |              | hypothetical protein                                                                                  |
| PA0557 |              | hypothetical protein                                                                                  |
| PA0560 |              | hypothetical protein                                                                                  |
| PA0562 |              | hydrolase                                                                                             |
| PA0565 |              | hypothetical protein                                                                                  |
| PA0571 |              | hypothetical protein                                                                                  |
| PA0572 |              | hypothetical protein                                                                                  |
| PA0573 |              | hypothetical protein                                                                                  |
| PA0575 |              | hypothetical protein                                                                                  |
| PA0584 | <i>cca</i>   | multifunctional tRNA nucleotidyl transferase/2'3'-cyclic phosphodiesterase/2'nucleotidase/phosphatase |
| PA0599 |              | hypothetical protein                                                                                  |
| PA0614 |              | hypothetical protein                                                                                  |
| PA0618 |              | bacteriophage protein                                                                                 |
| PA0671 |              | hypothetical protein                                                                                  |
| PA0678 |              | HxcU pseudopilin                                                                                      |
| PA0679 |              | hypothetical protein                                                                                  |
| PA0681 |              | HxcT pseudopilin                                                                                      |
| PA0683 |              | type II secretion system protein                                                                      |
| PA0684 |              | type II secretion system protein                                                                      |
| PA0692 |              | hypothetical protein                                                                                  |
| PA0693 | <i>exbB2</i> | transport protein ExbB2                                                                               |
| PA0694 | <i>exbD2</i> | transport protein ExbD                                                                                |
| PA0695 |              | hypothetical protein                                                                                  |
| PA0698 |              | hypothetical protein                                                                                  |
| PA0703 |              | major facilitator superfamily (MFS) transporter                                                       |
| PA0704 |              | amidase                                                                                               |
| PA0707 | <i>toxR</i>  | transcriptional regulator ToxR                                                                        |
| PA0708 |              | transcriptional regulator                                                                             |
| PA0725 |              | hypothetical protein                                                                                  |
| PA0734 |              | hypothetical protein                                                                                  |
| PA0739 |              | transcriptional regulator                                                                             |
| PA0740 | <i>sdsA1</i> | SDS hydrolase SdsA1                                                                                   |
| PA0755 | <i>opdH</i>  | cis-aconitate porin OpdH                                                                              |
| PA0756 |              | two-component response regulator                                                                      |
| PA0777 |              | hypothetical protein                                                                                  |
| PA0781 |              | hypothetical protein                                                                                  |
| PA0790 |              | hypothetical protein                                                                                  |
| PA0808 |              | hypothetical protein                                                                                  |
| PA0817 |              | ring-cleaving dioxygenase                                                                             |
| PA0821 |              | hypothetical protein                                                                                  |
| PA0827 |              | hypothetical protein                                                                                  |
| PA0841 |              | hypothetical protein                                                                                  |
| PA0842 |              | glycosyl transferase                                                                                  |
| PA0843 | <i>plcR</i>  | phospholipase accessory protein PlcR precursor                                                        |
| PA0844 | <i>plcH</i>  | hemolytic phospholipase C precursor                                                                   |

| ORF    | Gene         | Description                                   |
|--------|--------------|-----------------------------------------------|
| PA0848 |              | alkyl hydroperoxide reductase                 |
| PA0849 | <i>trxB2</i> | thioredoxin reductase 2                       |
| PA0872 | <i>phhA</i>  | phenylalanine 4-monooxygenase                 |
| PA0877 |              | transcriptional regulator                     |
| PA0882 |              | hypothetical protein                          |
| PA0884 |              | C4-dicarboxylate-binding periplasmic protein  |
| PA0885 |              | C4-dicarboxylate transporter                  |
| PA0907 |              | hypothetical protein                          |
| PA0908 |              | hypothetical protein                          |
| PA0914 |              | hypothetical protein                          |
| PA0924 |              | hypothetical protein                          |
| PA0926 |              | hypothetical protein                          |
| PA0940 |              | hypothetical protein                          |
| PA0977 |              | hypothetical protein                          |
| PA0990 |              | hypothetical protein                          |
| PA0996 | <i>pqsA</i>  | coenzyme A ligase                             |
| PA0997 | <i>pqsB</i>  | PqsB                                          |
| PA0998 | <i>pqsC</i>  | PqsC                                          |
| PA0999 | <i>pqsD</i>  | 3-oxoacyl-(acyl carrier protein) synthase III |
| PA1000 | <i>pqsE</i>  | Quinolone signal response protein             |
| PA1001 | <i>phnA</i>  | anthranilate synthase component I             |
| PA1002 | <i>phnB</i>  | anthranilate synthase component II            |
| PA1003 | <i>mvfR</i>  | Transcriptional regulator MvfR (pqsR)         |
| PA1007 |              | hypothetical protein                          |
| PA1019 | <i>muck</i>  | cis,cis-muconate transporter MuckK            |
| PA1046 |              | hypothetical protein                          |
| PA1067 |              | transcriptional regulator                     |
| PA1079 | <i>flgD</i>  | flagellar basal body rod modification protein |
| PA1080 | <i>flgE</i>  | flagellar hook protein FlgE                   |
| PA1081 | <i>flgF</i>  | flagellar basal body rod protein FlgF         |
| PA1088 |              | hypothetical protein                          |
| PA1089 |              | hypothetical protein                          |
| PA1092 | <i>fliC</i>  | flagellin type B                              |
| PA1093 |              | hypothetical protein                          |
| PA1106 |              | hypothetical protein                          |
| PA1120 | <i>tpbB</i>  | diguanylate cyclase TpbB                      |
| PA1130 | <i>rhIC</i>  | rhamnosyltransferase 2                        |
| PA1143 |              | hypothetical protein                          |
| PA1154 |              | hypothetical protein                          |
| PA1158 |              | two-component sensor                          |
| PA1159 |              | cold-shock protein                            |
| PA1172 | <i>napC</i>  | cytochrome c-type protein NapC                |
| PA1177 | <i>napE</i>  | periplasmic nitrate reductase protein NapE    |
| PA1182 |              | transcriptional regulator                     |
| PA1185 |              | glutathione S-transferase                     |
| PA1186 |              | hypothetical protein                          |

| ORF    | Gene          | Description                                        |
|--------|---------------|----------------------------------------------------|
| PA1215 |               | hypothetical protein                               |
| PA1220 |               | hypothetical protein                               |
| PA1225 |               | NAD(P)H dehydrogenase                              |
| PA1236 |               | major facilitator superfamily (MFS) transporter    |
| PA1239 |               | hypothetical protein                               |
| PA1248 | <i>aprF</i>   | Alkaline protease secretion outer membrane protein |
| PA1250 | <i>aprI</i>   | alkaline proteinase inhibitor AprI                 |
| PA1251 |               | chemotaxis transducer                              |
| PA1254 |               | dihydrodipicolinate synthetase                     |
| PA1256 |               | amino acid ABC transporter ATP binding protein     |
| PA1257 |               | amino acid ABC transporter membrane protein        |
| PA1258 |               | permease of ABC transporter                        |
| PA1259 |               | hypothetical protein                               |
| PA1262 |               | major facilitator superfamily (MFS) transporter    |
| PA1265 |               | hypothetical protein                               |
| PA1266 |               | oxidoreductase                                     |
| PA1270 |               | hypothetical protein                               |
| PA1284 |               | acyl-CoA dehydrogenase                             |
| PA1285 |               | transcriptional regulator                          |
| PA1299 |               | hypothetical protein                               |
| PA1300 |               | sigma-70 factor, ECF subfamily                     |
| PA1302 |               | heme utilization protein precursor                 |
| PA1310 | <i>phnW</i>   | 2-aminoethylphosphonate--pyruvate transaminase     |
| PA1313 |               | major facilitator superfamily (MFS) transporter    |
| PA1315 |               | transcriptional regulator                          |
| PA1316 |               | major facilitator superfamily (MFS) transporter    |
| PA1319 | <i>cyoC</i>   | cytochrome o ubiquinol oxidase subunit III         |
| PA1340 |               | amino acid ABC transporter membrane protein        |
| PA1341 |               | amino acid ABC transporter membrane protein        |
| PA1346 |               | hypothetical protein                               |
| PA1348 |               | hypothetical protein                               |
| PA1352 |               | hypothetical protein                               |
| PA1367 |               | hypothetical protein                               |
| PA1379 |               | short chain dehydrogenase                          |
| PA1387 |               | hypothetical protein                               |
| PA1388 |               | hypothetical protein                               |
| PA1390 |               | glycosyl transferase                               |
| PA1393 | <i>cysC</i>   | adenosine 5'-phosphosulfate (APS) kinase           |
| PA1395 |               | hypothetical protein                               |
| PA1396 |               | two-component sensor                               |
| PA1407 |               | hypothetical protein                               |
| PA1410 |               | periplasmic spermidine/putrescine-binding protein  |
| PA1418 | <i>sodium</i> | solute symport protein                             |
| PA1423 | <i>bdIA</i>   | BdIA                                               |
| PA1432 | <i>lasI</i>   | autoinducer synthesis protein LasI                 |
| PA1468 |               | hypothetical protein                               |

| ORF    | Gene         | Description                                          |
|--------|--------------|------------------------------------------------------|
| PA1486 |              | hypothetical protein                                 |
| PA1495 |              | hypothetical protein                                 |
| PA1496 |              | potassium channel                                    |
| PA1500 |              | oxidoreductase                                       |
| PA1502 | <i>gcl</i>   | glyoxylate carboligase                               |
| PA1503 |              | hypothetical protein                                 |
| PA1513 |              | hypothetical protein                                 |
| PA1516 |              | hypothetical protein                                 |
| PA1525 | <i>alkB2</i> | alkane-1-monooxygenase 2                             |
| PA1536 |              | hypothetical protein                                 |
| PA1538 |              | flavin-containing monooxygenase                      |
| PA1558 |              | hypothetical protein                                 |
| PA1564 |              | sulfur transfer protein SirA                         |
| PA1578 |              | hypothetical protein                                 |
| PA1608 |              | chemotaxis transducer                                |
| PA1617 |              | AMP-binding enzyme                                   |
| PA1621 |              | hydrolase                                            |
| PA1625 |              | hypothetical protein                                 |
| PA1626 |              | major facilitator superfamily (MFS) transporter      |
| PA1635 | <i>kdpC</i>  | potassium-transporting ATPase subunit C              |
| PA1637 | <i>kdpE</i>  | two-component response regulator KdpE                |
| PA1641 |              | hypothetical protein                                 |
| PA1644 |              | hypothetical protein                                 |
| PA1646 |              | chemotaxis transducer                                |
| PA1649 |              | short chain dehydrogenase                            |
| PA1656 |              | hypothetical protein                                 |
| PA1660 |              | hypothetical protein                                 |
| PA1688 |              | hypothetical protein                                 |
| PA1696 | <i>pscO</i>  | translocation protein in type III secretion          |
| PA1699 |              | conserved hypothetical protein in type III secretion |
| PA1706 | <i>pcrV</i>  | type III secretion protein PcrV                      |
| PA1712 | <i>exsB</i>  | exoenzyme S synthesis protein B                      |
| PA1715 | <i>pscB</i>  | type III export apparatus protein                    |
| PA1721 | <i>pscH</i>  | type III export protein PscH                         |
| PA1725 | <i>pscL</i>  | type III secretion system protein                    |
| PA1728 |              | hypothetical protein                                 |
| PA1740 |              | hypothetical protein                                 |
| PA1741 |              | hypothetical protein                                 |
| PA1743 |              | hypothetical protein                                 |
| PA1745 |              | hypothetical protein                                 |
| PA1763 |              | hypothetical protein                                 |
| PA1765 |              | hypothetical protein                                 |
| PA1783 | <i>nasA</i>  | nitrate transporter                                  |
| PA1784 |              | hypothetical protein                                 |
| PA1785 |              | hypothetical protein                                 |
| PA1827 |              | short-chain dehydrogenase                            |

| ORF    | Gene         | Description                                            |
|--------|--------------|--------------------------------------------------------|
| PA1839 |              | ribosomal RNA large subunit methyltransferase N        |
| PA1850 |              | transcriptional regulator                              |
| PA1855 |              | hypothetical protein                                   |
| PA1860 |              | hypothetical protein                                   |
| PA1868 | <i>xqhA</i>  | secretion protein XqhA                                 |
| PA1870 |              | hypothetical protein                                   |
| PA1872 |              | hypothetical protein                                   |
| PA1882 |              | transporter                                            |
| PA1887 |              | hypothetical protein                                   |
| PA1897 |              | hypothetical protein                                   |
| PA1898 | <i>qscR</i>  | quorum-sensing control repressor                       |
| PA1907 |              | hypothetical protein                                   |
| PA1915 |              | hypothetical protein                                   |
| PA1918 |              | hypothetical protein                                   |
| PA1922 |              | TonB-dependent receptor                                |
| PA1924 |              | hypothetical protein                                   |
| PA1929 |              | hypothetical protein                                   |
| PA1932 |              | hydroxylase molybdopterin-containing subunit           |
| PA1935 |              | hypothetical protein                                   |
| PA1936 |              | hypothetical protein                                   |
| PA1954 |              | hypothetical protein                                   |
| PA1956 |              | hypothetical protein                                   |
| PA1958 |              | transporter                                            |
| PA1962 | <i>azoR2</i> | azoreductase                                           |
| PA1968 |              | hypothetical protein                                   |
| PA1972 |              | hypothetical protein                                   |
| PA1984 | <i>exaC</i>  | NAD <sup>+</sup> dependent aldehyde dehydrogenase ExaC |
| PA1989 | <i>pqqE</i>  | pyrroloquinoline quinone biosynthesis protein PqqE     |
| PA1994 |              | hypothetical protein                                   |
| PA1995 |              | hypothetical protein                                   |
| PA1999 | <i>dhcA</i>  | DhcA, dehydrocarnitine CoA transferase, subunit A      |
| PA2000 | <i>dhcB</i>  | DhcB, dehydrocarnitine CoA transferase, subunit B      |
| PA2005 |              | transcriptional regulator                              |
| PA2009 | <i>hmgA</i>  | homogentisate 1,2-dioxygenase                          |
| PA2019 |              | periplasmic multidrug efflux lipoprotein precursor     |
| PA2034 |              | hypothetical protein                                   |
| PA2040 |              | glutamine synthetase                                   |
| PA2042 |              | serine/threonine transporter SstT                      |
| PA2053 | <i>cynT</i>  | carbonate dehydratase                                  |
| PA2056 |              | transcriptional regulator                              |
| PA2060 |              | permease of ABC transporter                            |
| PA2067 |              | hydrolase                                              |
| PA2069 |              | carbamoyl transferase                                  |
| PA2077 |              | hypothetical protein                                   |
| PA2085 |              | ring-hydroxylating dioxygenase small subunit           |
| PA2089 |              | hypothetical protein                                   |

| ORF    | Gene         | Description                                   |
|--------|--------------|-----------------------------------------------|
| PA2091 |              | hypothetical protein                          |
| PA2093 |              | RNA polymerase sigma factor                   |
| PA2100 |              | transcriptional regulator                     |
| PA2109 |              | hypothetical protein                          |
| PA2110 |              | hypothetical protein                          |
| PA2111 |              | hypothetical protein                          |
| PA2113 | <i>opdO</i>  | pyroglutamate porin OpdO                      |
| PA2115 |              | transcriptional regulator                     |
| PA2118 | <i>ada</i>   | O6-methylguanine-DNA methyltransferase        |
| PA2121 |              | transcriptional regulator                     |
| PA2130 | <i>cupA3</i> | usher CupA3                                   |
| PA2131 | <i>cupA4</i> | fimbrial subunit CupA4                        |
| PA2133 |              | hypothetical protein                          |
| PA2134 |              | hypothetical protein                          |
| PA2137 |              | hypothetical protein                          |
| PA2138 |              | ATP-dependent DNA ligase                      |
| PA2141 |              | hypothetical protein                          |
| PA2142 |              | short-chain dehydrogenase                     |
| PA2144 | <i>glgP</i>  | glycogen phosphorylase                        |
| PA2148 |              | hypothetical protein                          |
| PA2152 |              | trehalose synthase                            |
| PA2154 |              | hypothetical protein                          |
| PA2158 |              | alcohol dehydrogenase (Zn-dependent)          |
| PA2159 |              | hypothetical protein                          |
| PA2162 |              | maltooligosyl trehalose synthase              |
| PA2164 |              | glycosyl hydrolase                            |
| PA2168 |              | hypothetical protein                          |
| PA2183 |              | hypothetical protein                          |
| PA2184 |              | hypothetical protein                          |
| PA2188 |              | alcohol dehydrogenase (Zn-dependent)          |
| PA2192 |              | hypothetical protein                          |
| PA2193 | <i>hcnA</i>  | hydrogen cyanide synthase HcnA                |
| PA2209 |              | hypothetical protein                          |
| PA2213 |              | porin                                         |
| PA2216 |              | hypothetical protein                          |
| PA2248 | <i>bkdA2</i> | 2-oxoisovalerate dehydrogenase (beta subunit) |
| PA2254 | <i>pvcA</i>  | paerucumarin biosynthesis protein PvcA        |
| PA2255 | <i>pvcB</i>  | paerucumarin biosynthesis protein PvcB        |
| PA2262 |              | 2-ketogluconate transporter                   |
| PA2263 |              | 2-hydroxyacid dehydrogenase                   |
| PA2278 | <i>arsB</i>  | ArsB protein                                  |
| PA2284 |              | hypothetical protein                          |
| PA2300 | <i>chiC</i>  | chitinase                                     |
| PA2303 | <i>ambD</i>  | AmbD                                          |
| PA2304 | <i>ambC</i>  | AmbC                                          |
| PA2307 |              | permease of ABC transporter                   |

| ORF    | Gene         | Description                                                                 |
|--------|--------------|-----------------------------------------------------------------------------|
| PA2308 |              | ATP-binding component of ABC transporter                                    |
| PA2309 |              | hypothetical protein                                                        |
| PA2312 |              | transcriptional regulator                                                   |
| PA2319 |              | transposase                                                                 |
| PA2325 |              | hypothetical protein                                                        |
| PA2336 |              | hypothetical protein                                                        |
| PA2348 |              | hypothetical protein                                                        |
| PA2350 |              | ATP-binding component of ABC transporter                                    |
| PA2352 |              | glycerophosphoryl diester phosphodiesterase                                 |
| PA2354 |              | transcriptional regulator                                                   |
| PA2359 |              | transcriptional regulator                                                   |
| PA2366 |              | uricase PuuD                                                                |
| PA2368 |              | hypothetical protein                                                        |
| PA2380 |              | hypothetical protein                                                        |
| PA2383 |              | transcriptional regulator                                                   |
| PA2389 | <i>pvdR</i>  | PvdR                                                                        |
| PA2404 |              | hypothetical protein                                                        |
| PA2405 |              | hypothetical protein                                                        |
| PA2408 |              | ATP-binding component of ABC transporter                                    |
| PA2411 |              | thioesterase                                                                |
| PA2412 |              | hypothetical protein                                                        |
| PA2418 |              | hypothetical protein                                                        |
| PA2425 | <i>pvdG</i>  | PvdG                                                                        |
| PA2426 | <i>pvdS</i>  | extracytoplasmic-function sigma-70 factor                                   |
| PA2428 |              | hypothetical protein                                                        |
| PA2435 |              | cation-transporting P-type ATPase                                           |
| PA2438 |              | hypothetical protein                                                        |
| PA2444 | <i>glyA2</i> | serine hydroxymethyltransferase                                             |
| PA2446 | <i>gcvH2</i> | glycine cleavage system protein H                                           |
| PA2452 |              | hypothetical protein                                                        |
| PA2453 |              | hypothetical protein                                                        |
| PA2460 |              | hypothetical protein                                                        |
| PA2461 |              | hypothetical protein                                                        |
| PA2465 |              | hypothetical protein                                                        |
| PA2469 |              | transcriptional regulator                                                   |
| PA2471 |              | hypothetical protein                                                        |
| PA2472 |              | major facilitator superfamily (MFS) transporter                             |
| PA2474 |              | hypothetical protein                                                        |
| PA2475 |              | cytochrome P450                                                             |
| PA2476 | <i>dsbG</i>  | disulfide isomerase/thiol-disulfide oxidase                                 |
| PA2477 | <i>thiol</i> | disulfide interchange protein                                               |
| PA2479 |              | two-component response regulator                                            |
| PA2485 |              | hypothetical protein                                                        |
| PA2490 |              | hypothetical protein                                                        |
| PA2494 | <i>mexF</i>  | Resistance-Nodulation-Cell Division (RND) multidrug efflux transporter MexF |
| PA2495 | <i>oprN</i>  | Multidrug efflux outer membrane protein OprN precursor                      |

| ORF    | Gene        | Description                                                                                                   |
|--------|-------------|---------------------------------------------------------------------------------------------------------------|
| PA2496 |             | hypothetical protein                                                                                          |
| PA2498 |             | hypothetical protein                                                                                          |
| PA2507 | <i>catA</i> | catechol 1,2-dioxygenase                                                                                      |
| PA2508 | <i>catC</i> | muconolactone delta-isomerase                                                                                 |
| PA2517 | <i>xyfY</i> | toluate 1,2-dioxygenase beta subunit                                                                          |
| PA2521 | <i>czcB</i> | Resistance-Nodulation-Cell Division (RND) divalent metal cation efflux membrane fusion protein CzcB precursor |
| PA2522 | <i>czcC</i> | outer membrane protein precursor CzcC                                                                         |
| PA2544 |             | hypothetical protein                                                                                          |
| PA2555 |             | AMP-binding enzyme                                                                                            |
| PA2561 |             | chemotaxis transducer                                                                                         |
| PA2577 |             | transcriptional regulator                                                                                     |
| PA2580 |             | hypothetical protein                                                                                          |
| PA2590 |             | hypothetical protein                                                                                          |
| PA2591 |             | transcriptional regulator VqsR                                                                                |
| PA2592 |             | periplasmic spermidine/putrescine-binding protein                                                             |
| PA2594 |             | hypothetical protein                                                                                          |
| PA2610 |             | hypothetical protein                                                                                          |
| PA2617 | <i>aat</i>  | leucyl/phenylalanyl-tRNA--protein transferase                                                                 |
| PA2618 |             | arginyl-tRNA-protein transferase                                                                              |
| PA2625 |             | hypothetical protein                                                                                          |
| PA2666 |             | 6-pyruvoyl tetrahydrobiopterin synthase                                                                       |
| PA2668 |             | hypothetical protein                                                                                          |
| PA2671 |             | hypothetical protein                                                                                          |
| PA2672 |             | type II secretion system protein                                                                              |
| PA2673 |             | type II secretion system protein                                                                              |
| PA2699 |             | hypothetical protein                                                                                          |
| PA2701 |             | major facilitator superfamily (MFS) transporter                                                               |
| PA2704 |             | transcriptional regulator                                                                                     |
| PA2711 |             | periplasmic spermidine/putrescine-binding protein                                                             |
| PA2714 |             | molybdopterin oxidoreductase                                                                                  |
| PA2719 |             | hypothetical protein                                                                                          |
| PA2721 |             | hypothetical protein                                                                                          |
| PA2722 |             | hypothetical protein                                                                                          |
| PA2745 |             | hydrolase                                                                                                     |
| PA2747 |             | hypothetical protein                                                                                          |
| PA2767 |             | enoyl-CoA hydratase/isomerase                                                                                 |
| PA2778 |             | hypothetical protein                                                                                          |
| PA2782 |             | hypothetical protein                                                                                          |
| PA2783 |             | hypothetical protein                                                                                          |
| PA2788 |             | chemotaxis transducer                                                                                         |
| PA2791 |             | hypothetical protein                                                                                          |
| PA2795 |             | tRNA-dihydrouridine synthase A                                                                                |
| PA2804 |             | hypothetical protein                                                                                          |
| PA2807 |             | hypothetical protein                                                                                          |
| PA2809 | <i>copR</i> | two-component response regulator, CopR                                                                        |

| ORF    | Gene        | Description                                              |
|--------|-------------|----------------------------------------------------------|
| PA2816 |             | hypothetical protein                                     |
| PA2832 | <i>tpm</i>  | thiopurine S-methyltransferase                           |
| PA2833 |             | hypothetical protein                                     |
| PA2834 |             | transcriptional regulator                                |
| PA2835 |             | major facilitator superfamily (MFS) transporter          |
| PA2868 |             | hypothetical protein                                     |
| PA2869 |             | hypothetical protein                                     |
| PA2871 |             | hypothetical protein                                     |
| PA2872 |             | hypothetical protein                                     |
| PA2875 |             | hypothetical protein                                     |
| PA2890 | <i>atuE</i> | isohexenylglutaconyl-CoA hydratase                       |
| PA2892 | <i>atuG</i> | short chain dehydrogenase                                |
| PA2905 | <i>cobH</i> | precorrin-8X methylmutase                                |
| PA2909 |             | cobalt-precorrin-6x reductase                            |
| PA2911 |             | TonB-dependent receptor                                  |
| PA2912 |             | ATP-binding component of ABC transporter                 |
| PA2916 |             | hypothetical protein                                     |
| PA2918 |             | short chain dehydrogenase                                |
| PA2923 | <i>hisJ</i> | periplasmic histidine-binding protein HisJ               |
| PA2924 | <i>hisQ</i> | histidine transport system permease HisQ                 |
| PA2934 | <i>cif</i>  | CFTR inhibitory factor, Cif                              |
| PA2936 |             | hypothetical protein                                     |
| PA2938 |             | transporter                                              |
| PA2940 |             | acyl-CoA thiolase                                        |
| PA2985 |             | hypothetical protein                                     |
| PA2989 |             | hypothetical protein                                     |
| PA3023 |             | lipid kinase                                             |
| PA3035 |             | glutathione S-transferase                                |
| PA3044 |             | two-component sensor                                     |
| PA3061 | <i>peID</i> | PeID                                                     |
| PA3063 | <i>peIB</i> | PeIB                                                     |
| PA3078 |             | two-component sensor                                     |
| PA3119 |             | hypothetical protein                                     |
| PA3130 |             | hypothetical protein                                     |
| PA3132 |             | hydrolase                                                |
| PA3133 |             | transcriptional regulator                                |
| PA3140 |             | hypothetical protein                                     |
| PA3174 |             | transcriptional regulator                                |
| PA3175 |             | formimidoylglutamase                                     |
| PA3176 | <i>gltS</i> | glutamate/sodium ion symporter, GltS                     |
| PA3186 | <i>oprB</i> | Glucose/carbohydrate outer membrane porin OprB precursor |
| PA3187 |             | ATP-binding component of ABC transporter                 |
| PA3188 |             | permease of ABC sugar transporter                        |
| PA3209 |             | hypothetical protein                                     |
| PA3216 |             | hypothetical protein                                     |
| PA3218 |             | hypothetical protein                                     |

| ORF    | Gene         | Description                                              |
|--------|--------------|----------------------------------------------------------|
| PA3219 |              | hypothetical protein                                     |
| PA3223 | <i>azoR3</i> | AzoR3, azoreductase 3                                    |
| PA3224 |              | hypothetical protein                                     |
| PA3230 |              | hypothetical protein                                     |
| PA3240 |              | hypothetical protein                                     |
| PA3248 |              | hypothetical protein                                     |
| PA3251 |              | hypothetical protein                                     |
| PA3259 |              | hypothetical protein                                     |
| PA3273 |              | hypothetical protein                                     |
| PA3274 |              | hypothetical protein                                     |
| PA3279 | <i>oprP</i>  | Phosphate-specific outer membrane porin OprP precursor   |
| PA3282 |              | hypothetical protein                                     |
| PA3293 |              | hypothetical protein                                     |
| PA3307 |              | hypothetical protein                                     |
| PA3318 |              | hypothetical protein                                     |
| PA3319 | <i>plcN</i>  | non-hemolytic phospholipase C precursor                  |
| PA3325 |              | hypothetical protein                                     |
| PA3328 |              | FAD-dependent monooxygenase                              |
| PA3329 |              | hypothetical protein                                     |
| PA3331 |              | cytochrome P450                                          |
| PA3332 |              | hypothetical protein                                     |
| PA3333 | <i>fabH2</i> | 3-oxoacyl-(acyl carrier protein) synthase III            |
| PA3334 |              | acyl carrier protein                                     |
| PA3335 |              | hypothetical protein                                     |
| PA3348 |              | chemotaxis protein methyltransferase                     |
| PA3349 |              | chemotaxis protein                                       |
| PA3355 |              | hypothetical protein                                     |
| PA3358 |              | hypothetical protein                                     |
| PA3359 |              | hypothetical protein                                     |
| PA3370 |              | hypothetical protein                                     |
| PA3371 |              | hypothetical protein                                     |
| PA3376 |              | phosphonate C-P lyase system protein PhnK                |
| PA3379 |              | carbon-phosphorus lyase complex subunit                  |
| PA3380 |              | hypothetical protein                                     |
| PA3381 |              | transcriptional regulator                                |
| PA3383 |              | binding protein component of ABC phosphonate transporter |
| PA3388 |              | hypothetical protein                                     |
| PA3394 | <i>nosF</i>  | NosF protein                                             |
| PA3395 | <i>nosY</i>  | NosY protein                                             |
| PA3406 | <i>hasD</i>  | transport protein HasD                                   |
| PA3410 |              | sigma-70 factor, ECF subfamily                           |
| PA3413 |              | hypothetical protein                                     |
| PA3417 |              | pyruvate dehydrogenase E1 component, alpha subunit       |
| PA3421 |              | hypothetical protein                                     |
| PA3422 |              | hypothetical protein                                     |
| PA3425 |              | hypothetical protein                                     |

| ORF    | Gene        | Description                                                                                                        |
|--------|-------------|--------------------------------------------------------------------------------------------------------------------|
| PA3429 |             | epoxide hydrolase                                                                                                  |
| PA3436 |             | hypothetical protein                                                                                               |
| PA3444 |             | alkanesulfonate monooxygenase                                                                                      |
| PA3445 |             | hypothetical protein                                                                                               |
| PA3447 |             | ATP-binding component of ABC transporter                                                                           |
| PA3449 |             | hypothetical protein                                                                                               |
| PA3457 |             | hypothetical protein                                                                                               |
| PA3463 |             | hypothetical protein                                                                                               |
| PA3472 |             | hypothetical protein                                                                                               |
| PA3476 | <i>rhII</i> | autoinducer synthesis protein RhII                                                                                 |
| PA3478 | <i>rhIB</i> | rhamnosyltransferase chain B                                                                                       |
| PA3479 | <i>rhIA</i> | rhamnosyltransferase chain A                                                                                       |
| PA3486 |             | hypothetical protein                                                                                               |
| PA3493 |             | hypothetical protein                                                                                               |
| PA3497 |             | hypothetical protein                                                                                               |
| PA3498 |             | oxidoreductase                                                                                                     |
| PA3505 |             | L-aspartate dehydrogenase                                                                                          |
| PA3506 |             | hypothetical protein                                                                                               |
| PA3509 |             | hydrolase                                                                                                          |
| PA3510 |             | hypothetical protein                                                                                               |
| PA3511 |             | short chain dehydrogenase                                                                                          |
| PA3515 |             | hypothetical protein                                                                                               |
| PA3519 |             | hypothetical protein                                                                                               |
| PA3523 |             | Resistance-Nodulation-Cell Division (RND) efflux membrane fusion protein precursor                                 |
| PA3530 |             | hypothetical protein                                                                                               |
| PA3537 | <i>argF</i> | ornithine carbamoyltransferase                                                                                     |
| PA3541 | <i>alg8</i> | alginate biosynthesis protein Alg8                                                                                 |
| PA3544 | <i>algE</i> | Alginate production outer membrane protein AlgE precursor                                                          |
| PA3546 | <i>algX</i> | alginate biosynthesis protein AlgX                                                                                 |
| PA3547 | <i>algL</i> | poly(beta-D-mannuronate) lyase<br>phosphomannose isomerase / guanosine 5'-diphospho-D-mannose<br>pyrophosphorylase |
| PA3551 | <i>algA</i> | hypothetical protein                                                                                               |
| PA3564 |             | hypothetical protein                                                                                               |
| PA3566 |             | hypothetical protein                                                                                               |
| PA3569 | <i>mmsB</i> | 3-hydroxyisobutyrate dehydrogenase                                                                                 |
| PA3588 |             | porin                                                                                                              |
| PA3593 |             | acyl-CoA dehydrogenase                                                                                             |
| PA3595 |             | major facilitator superfamily (MFS) transporter                                                                    |
| PA3597 |             | amino acid permease                                                                                                |
| PA3598 |             | hypothetical protein                                                                                               |
| PA3611 |             | hypothetical protein                                                                                               |
| PA3630 |             | transcriptional regulator                                                                                          |
| PA3678 |             | transcriptional regulator                                                                                          |
| PA3684 |             | hypothetical protein                                                                                               |
| PA3713 | <i>spdH</i> | spermidine dehydrogenase, SpdH                                                                                     |
| PA3722 |             | hypothetical protein                                                                                               |

| ORF    | Gene        | Description                                      |
|--------|-------------|--------------------------------------------------|
| PA3724 | <i>lasB</i> | elastase LasB                                    |
| PA3734 |             | hypothetical protein                             |
| PA3747 |             | hypothetical protein                             |
| PA3750 |             | hypothetical protein                             |
| PA3758 |             | N-acetylglucosamine-6-phosphate deacetylase      |
| PA3762 |             | hypothetical protein                             |
| PA3765 |             | hypothetical protein                             |
| PA3772 |             | hypothetical protein                             |
| PA3773 |             | hypothetical protein                             |
| PA3775 |             | hypothetical protein                             |
| PA3818 |             | extragenic suppressor protein SuhB               |
| PA3825 |             | hypothetical protein                             |
| PA3829 |             | hypothetical protein                             |
| PA3842 |             | chaperone                                        |
| PA3844 |             | hypothetical protein                             |
| PA3845 |             | transcriptional regulator                        |
| PA3854 |             | GIY-YIG nuclease superfamily protein             |
| PA3855 |             | hypothetical protein                             |
| PA3867 |             | DNA invertase                                    |
| PA3885 | <i>tpbA</i> | protein tyrosine phosphatase TpbA                |
| PA3888 |             | permease of ABC transporter                      |
| PA3905 |             | hypothetical protein                             |
| PA3906 |             | hypothetical protein                             |
| PA3907 |             | hypothetical protein                             |
| PA3908 |             | hypothetical protein                             |
| PA3909 | <i>eddB</i> | Extracellular DNA degradation protein, EddB      |
| PA3924 |             | long-chain-fatty-acid--CoA ligase                |
| PA3928 |             | hypothetical protein                             |
| PA3931 |             | hypothetical protein                             |
| PA3935 | <i>tauD</i> | taurine dioxygenase                              |
| PA3937 |             | ATP-binding component of ABC taurine transporter |
| PA3943 |             | hypothetical protein                             |
| PA3947 | <i>rocR</i> | RocR                                             |
| PA3953 |             | hypothetical protein                             |
| PA3954 |             | hypothetical protein                             |
| PA3958 |             | hypothetical protein                             |
| PA3959 |             | hypothetical protein                             |
| PA3962 |             | hypothetical protein                             |
| PA3963 |             | transporter                                      |
| PA3966 |             | hypothetical protein                             |
| PA3967 |             | hypothetical protein                             |
| PA3976 | <i>thiE</i> | thiamine-phosphate pyrophosphorylase             |
| PA3986 |             | hypothetical protein                             |
| PA3991 |             | hypothetical protein                             |
| PA4018 |             | hypothetical protein                             |
| PA4026 |             | acetyltransferase                                |

| ORF    | Gene         | Description                                         |
|--------|--------------|-----------------------------------------------------|
| PA4033 |              | hypothetical protein                                |
| PA4034 | <i>aqpZ</i>  | aquaporin Z                                         |
| PA4037 |              | ATP-binding component of ABC transporter            |
| PA4040 |              | hypothetical protein                                |
| PA4041 |              | hypothetical protein                                |
| PA4046 |              | hypothetical protein                                |
| PA4064 |              | ATP-binding component of ABC transporter            |
| PA4070 |              | DNA-binding transcriptional activator FeaR          |
| PA4071 |              | hypothetical protein                                |
| PA4076 |              | hypothetical protein                                |
| PA4082 | <i>cupB5</i> | adhesive protein CupB5                              |
| PA4099 |              | hypothetical protein                                |
| PA4104 |              | hypothetical protein                                |
| PA4106 |              | hypothetical protein                                |
| PA4113 |              | sugar efflux transporter                            |
| PA4119 | <i>aph</i>   | aminoglycoside 3'-phosphotransferase type IIb       |
| PA4125 | <i>hpcD</i>  | 5-carboxymethyl-2-hydroxyruconate isomerase         |
| PA4136 |              | major facilitator superfamily (MFS) transporter     |
| PA4139 |              | hypothetical protein                                |
| PA4144 |              | outer membrane protein precursor                    |
| PA4160 | <i>fepD</i>  | ferric enterobactin transport protein FepD          |
| PA4164 |              | hypothetical protein                                |
| PA4169 |              | hypothetical protein                                |
| PA4172 |              | nuclease                                            |
| PA4185 |              | transcriptional regulator                           |
| PA4188 |              | hypothetical protein                                |
| PA4189 |              | aldehyde dehydrogenase                              |
| PA4190 | <i>pqsL</i>  | monooxygenase                                       |
| PA4191 |              | iron/ascorbate oxidoreductase                       |
| PA4193 |              | permease of ABC transporter                         |
| PA4194 |              | permease of ABC transporter                         |
| PA4195 |              | binding protein component of ABC transporter        |
| PA4208 | <i>opmD</i>  | outer membrane protein precursor                    |
| PA4209 | <i>phzM</i>  | phenazine-specific methyltransferase                |
| PA4211 | <i>phzB1</i> | phenazine biosynthesis protein                      |
| PA4219 |              | hypothetical protein                                |
| PA4220 |              | hypothetical protein                                |
| PA4221 | <i>fptA</i>  | Fe(III)-pyochelin outer membrane receptor precursor |
| PA4224 | <i>pchG</i>  | pyochelin biosynthetic protein PchG                 |
| PA4225 | <i>pchF</i>  | pyochelin synthetase                                |
| PA4227 | <i>pchR</i>  | transcriptional regulator PchR                      |
| PA4229 | <i>pchC</i>  | pyochelin biosynthetic protein PchC                 |
| PA4290 |              | chemotaxis transducer                               |
| PA4291 |              | hypothetical protein                                |
| PA4293 | <i>pprA</i>  | two-component sensor PprA                           |
| PA4301 | <i>tadB</i>  | TadB                                                |

| ORF    | Gene         | Description                                 |
|--------|--------------|---------------------------------------------|
| PA4303 | <i>tadZ</i>  | TadZ                                        |
| PA4304 | <i>rcpA</i>  | RcpA                                        |
| PA4326 |              | hypothetical protein                        |
| PA4341 |              | transcriptional regulator                   |
| PA4344 |              | hydrolase                                   |
| PA4362 |              | hypothetical protein                        |
| PA4369 |              | hypothetical protein                        |
| PA4396 |              | two-component response regulator            |
| PA4397 | <i>panE</i>  | 2-dehydropantoate 2-reductase               |
| PA4422 |              | hypothetical protein                        |
| PA4436 |              | transcriptional regulator                   |
| PA4437 |              | hypothetical protein                        |
| PA4469 |              | hypothetical protein                        |
| PA4470 | <i>fumC1</i> | fumarate hydratase                          |
| PA4481 | <i>mreB</i>  | rod shape-determining protein MreB          |
| PA4504 |              | permease of ABC transporter                 |
| PA4505 |              | ATP-binding component of ABC transporter    |
| PA4507 |              | hypothetical protein                        |
| PA4509 |              | hypothetical protein                        |
| PA4510 |              | hypothetical protein                        |
| PA4541 |              | hypothetical protein                        |
| PA4543 |              | hypothetical protein                        |
| PA4544 | <i>rluD</i>  | pseudouridine synthase                      |
| PA4563 | <i>rpsT</i>  | 30S ribosomal protein S20                   |
| PA4570 |              | hypothetical protein                        |
| PA4589 |              | outer membrane protein precursor            |
| PA4590 | <i>pra</i>   | protein activator                           |
| PA4591 |              | hypothetical protein                        |
| PA4601 | <i>morA</i>  | motility regulator                          |
| PA4623 |              | hypothetical protein                        |
| PA4629 |              | hypothetical protein                        |
| PA4633 |              | chemotaxis transducer                       |
| PA4651 |              | pili assembly chaperone                     |
| PA4679 |              | hypothetical protein                        |
| PA4681 |              | hypothetical protein                        |
| PA4683 |              | hypothetical protein                        |
| PA4692 |              | sulfite oxidase subunit YedY                |
| PA4697 |              | hypothetical protein                        |
| PA4702 |              | hypothetical protein                        |
| PA4703 |              | hypothetical protein                        |
| PA4712 |              | hypothetical protein                        |
| PA4719 |              | transporter                                 |
| PA4738 |              | hypothetical protein                        |
| PA4786 |              | 3-ketoacyl-(acyl-carrier-protein) reductase |
| PA4788 |              | hypothetical protein                        |
| PA4789 |              | hypothetical protein                        |

| ORF    | Gene         | Description                                           |
|--------|--------------|-------------------------------------------------------|
| PA4791 |              | hypothetical protein                                  |
| PA4802 |              | hypothetical protein                                  |
| PA4806 |              | transcriptional regulator                             |
| PA4817 |              | hypothetical protein                                  |
| PA4820 |              | hypothetical protein                                  |
| PA4822 |              | hypothetical protein                                  |
| PA4825 | <i>mgtA</i>  | Mg(2+) transport ATPase, P-type 2                     |
| PA4834 |              | hypothetical protein                                  |
| PA4844 |              | chemotaxis transducer                                 |
| PA4849 |              | hypothetical protein                                  |
| PA4851 |              | hypothetical protein                                  |
| PA4858 |              | hypothetical protein                                  |
| PA4859 |              | permease of ABC transporter                           |
| PA4861 |              | ATP-binding component of ABC transporter              |
| PA4862 |              | ATP-binding component of ABC transporter              |
| PA4864 | <i>ureD</i>  | urease accessory protein                              |
| PA4865 | <i>ureA</i>  | urease subunit gamma                                  |
| PA4871 |              | hypothetical protein                                  |
| PA4875 |              | hypothetical protein                                  |
| PA4880 |              | bacterioferritin                                      |
| PA4891 | <i>ureE</i>  | urease accessory protein UreE                         |
| PA4895 |              | transmembrane sensor                                  |
| PA4911 |              | permease of ABC branched-chain amino acid transporter |
| PA4914 |              | transcriptional regulator                             |
| PA4925 |              | hypothetical protein                                  |
| PA4927 |              | hypothetical protein                                  |
| PA4978 |              | hypothetical protein                                  |
| PA4979 |              | acyl-CoA dehydrogenase                                |
| PA4985 |              | hypothetical protein                                  |
| PA4986 |              | oxidoreductase                                        |
| PA4993 |              | hypothetical protein                                  |
| PA5024 |              | hypothetical protein                                  |
| PA5033 |              | hypothetical protein                                  |
| PA5050 | <i>priA</i>  | primosome assembly protein PriA                       |
| PA5057 | <i>phaD</i>  | poly(3-hydroxyalkanoic acid) depolymerase             |
| PA5058 | <i>phaC2</i> | poly(3-hydroxyalkanoic acid) synthase 2               |
| PA5059 |              | transcriptional regulator                             |
| PA5072 |              | chemotaxis transducer                                 |
| PA5095 |              | permease of ABC transporter                           |
| PA5101 |              | hypothetical protein                                  |
| PA5123 |              | hypothetical protein                                  |
| PA5127 |              | rRNA methylase                                        |
| PA5144 |              | hypothetical protein                                  |
| PA5154 |              | permease of ABC transporter                           |
| PA5157 |              | transcriptional regulator                             |
| PA5167 |              | c4-dicarboxylate-binding protein                      |

| ORF      | Gene         | Description                                                 |
|----------|--------------|-------------------------------------------------------------|
| PA5168   |              | dicarboxylate transporter                                   |
| PA5180   |              | hypothetical protein                                        |
| PA5191   |              | hypothetical protein                                        |
| PA5221   |              | 2-octaprenyl-3-methyl-6-methoxy-1,4-benzoquinol hydroxylase |
| PA5246   |              | hypothetical protein                                        |
| PA5247   |              | hypothetical protein                                        |
| PA5249   |              | hypothetical protein                                        |
| PA5280   | <i>sss</i>   | site-specific tyrosine recombinase XerC                     |
| PA5284   |              | hypothetical protein                                        |
| PA5293   |              | transcriptional regulator                                   |
| PA5294   |              | multidrug efflux protein NorA                               |
| PA5311   |              | major facilitator superfamily (MFS) transporter             |
| PA5314   |              | hypothetical protein                                        |
| PA5348   |              | DNA-binding protein                                         |
| PA5353   | <i>glcF</i>  | glycolate oxidase iron-sulfur subunit                       |
| PA5370   |              | major facilitator superfamily (MFS) transporter             |
| PA5375   | <i>betT1</i> | choline transporter BetT                                    |
| PA5383   |              | hypothetical protein                                        |
| PA5384   |              | lipolytic enzyme                                            |
| PA5385   | <i>cdhB</i>  | CdhB, Carnitine dehydrogenase-related protein B             |
| PA5391   |              | hypothetical protein                                        |
| PA5400   |              | electron transfer flavoprotein alpha subunit                |
| PA5402   |              | hypothetical protein                                        |
| PA5418   | <i>soxA</i>  | sarcosine oxidase alpha subunit                             |
| PA5437   |              | transcriptional regulator                                   |
| PA5442   |              | hypothetical protein                                        |
| PA5444   |              | hypothetical protein                                        |
| PA5462   |              | hypothetical protein                                        |
| PA5463   |              | hypothetical protein                                        |
| PA5464   |              | hypothetical protein                                        |
| PA5465   |              | hypothetical protein                                        |
| PA5469   |              | hypothetical protein                                        |
| PA5471.1 |              | leader peptide                                              |
| PA5480   |              | hypothetical protein                                        |
| PA5482   |              | hypothetical protein                                        |
| PA5501   | <i>znuB</i>  | permease of ABC zinc transporter ZnuB                       |
| PA5506   |              | hypothetical protein                                        |
| PA5507   |              | hypothetical protein                                        |
| PA5513   | <i>poxA</i>  | hypothetical protein                                        |
| PA5516   | <i>pdxY</i>  | pyridoxamine kinase                                         |
| PA5519   |              | hypothetical protein                                        |
| PA5520   |              | hypothetical protein                                        |
| PA5534   |              | hypothetical protein                                        |
| PA5539   |              | GTP cyclohydrolase                                          |
| PA5541   | <i>pyrQ</i>  | dihydroorotase                                              |
| PA5543   |              | hypothetical protein                                        |

<sup>a</sup> *P. aeruginosa* PAO1 expressing *bpiB09* compared to a control-strain with empty vector, samplepoint 5h.  
<sup>b</sup> Gene Number, Name and description are from the *Pseudomonas* genome project [33].
