# Supplementary material for: A Novel Metagenomic Short-Chain Dehydrogenase/Reductase Attenuates Pseudomonas aeruginosa Biofilm Formation and Virulence on Caenorhabditis elegans
Source: PubMed Central journal article supplement (PMC3202535; doi:10.1371/journal.pone.0026278), 2011-10-26
Supplement: pone.0026278.s007.pdf [file pone.0026278.s007.pdf]

**Table S3.**  $\geq 10$ -fold induced genes/ORFs in PAO1 expressing *bpiB09*<sup>a</sup>

| ORF <sup>b</sup> | Gene        | Description                              |
|------------------|-------------|------------------------------------------|
| PA2222           |             | hypothetical protein                     |
| PA2223           |             | hypothetical protein                     |
| PA2224           |             | hypothetical protein                     |
| PA2225           |             | hypothetical protein                     |
| PA2226           |             | hypothetical protein                     |
| PA2227           | <i>vqsM</i> | AraC-type transcriptional regulator VqsM |
| PA2228           |             | hypothetical protein                     |
| PA2694           |             | thioredoxin                              |

<sup>a</sup> *P. aeruginosa* PAO1 expressing *bpiB09* compared to a control-strain with empty vector, samplepoint 5h.

<sup>b</sup> Gene Number, Name and description are from the *Pseudomonas* genome project [8].
