# Supplementary material for: A Novel Metagenomic Short-Chain Dehydrogenase/Reductase Attenuates Pseudomonas aeruginosa Biofilm Formation and Virulence on Caenorhabditis elegans
Source: PubMed Central journal article supplement (PMC3202535; doi:10.1371/journal.pone.0026278), 2011-10-26
Supplement: pone.0026278.s008.pdf [file pone.0026278.s008.pdf]

**TABLE S4.** Primers used in this study.

| <b>ORF</b>           | <b>Primer 5' – 3'</b>                                                    |
|----------------------|--------------------------------------------------------------------------|
| <i>bpiB09_pBBR</i>   | for: CTAAGCTTACTGGGGAATGTTCCGTTGA<br>rev: GCAAGCTTGAAATAAGCACAGCTCTCGA   |
| <i>bpiB09_pet</i>    | for: GACATATGAGTTCCCTTTCCGGACA<br>rev: GCGGATCCCTTCTTCAGCGTAGGCCGCA      |
| <i>ACP_0942_pBBR</i> | for: ATGAAGCTTTGGAACCTGGCCGGAAGAGG<br>rev: ATGGGATCCAGTCGCCGCTCGTCAGCATC |
| <i>B09-D109K</i>     | for: ACCGGCGGAGTGAAAGCGCTGATCGCGG<br>rev: TTCATCGTGTGCAGCGGCCCGCCGAACCA  |
| <i>B09- G162Y</i>    | for: CGGCTTCAAAATGGTACTTGAACGGGCTGA<br>rev: TATACGCCGCCCATCCGCCACCGGATT  |
| <i>B09-Δ227-239</i>  | for: TAGCTCGAGGATCCGGCTGCTAACA<br>rev: AGACTGGTCCGCCTGCGTCGCCA           |
